# Supplementary material for: Composite Bone Cements with Enhanced Drug Elution
Source: MDPI journal article supplement (doi:10.3390/polym15183757), 2023-09-14
Supplement: s1 [file s1]

# Supplementary Materials

## Composite Bone Cements with Enhanced Drug Elution

Kirill Cherednichenko <sup>1</sup>, Adeliya Sayfutdinova <sup>1</sup>, Denis Rimashevskiy <sup>1,2</sup>, Birzhan Malik <sup>3</sup>, Andrey Panchenko <sup>1</sup>, Maria Kopitsyna <sup>4</sup>, Stanislav Rangaev <sup>5</sup>, Vladimir Vinokurov <sup>1</sup>, Denis Voronin <sup>1</sup> and Dmitry Kopitsyn <sup>1,\*</sup>

<sup>1</sup> Department of Physical and Colloid Chemistry, Faculty of Chemical and Environmental Engineering, National University of Oil and Gas “Gubkin University”, Moscow 119991, Russia; cherednichenko.k@gubkin.ru (K.C.)

<sup>2</sup> Department of Traumatology and Orthopedics, Peoples’ Friendship University of Russia, Moscow 117198, Russia

<sup>3</sup> Astana Medical University, Beybitshilik Street 49a, Astana 010000, Kazakhstan; bmalik1971@mail.ru

<sup>4</sup> Russian Institute for Scientific and Technical Information “VINITI RAS”, Moscow 125190, Russia; mariankuznetsova@gmail.com

<sup>5</sup> Multidisciplinary Hospital Named after Professor Kh.Zh. Makazhanov, Karaganda 100000, Kazakhstan; stas.rangaev@mail.ru

\* Correspondence: kopicin.d@inbox.ru

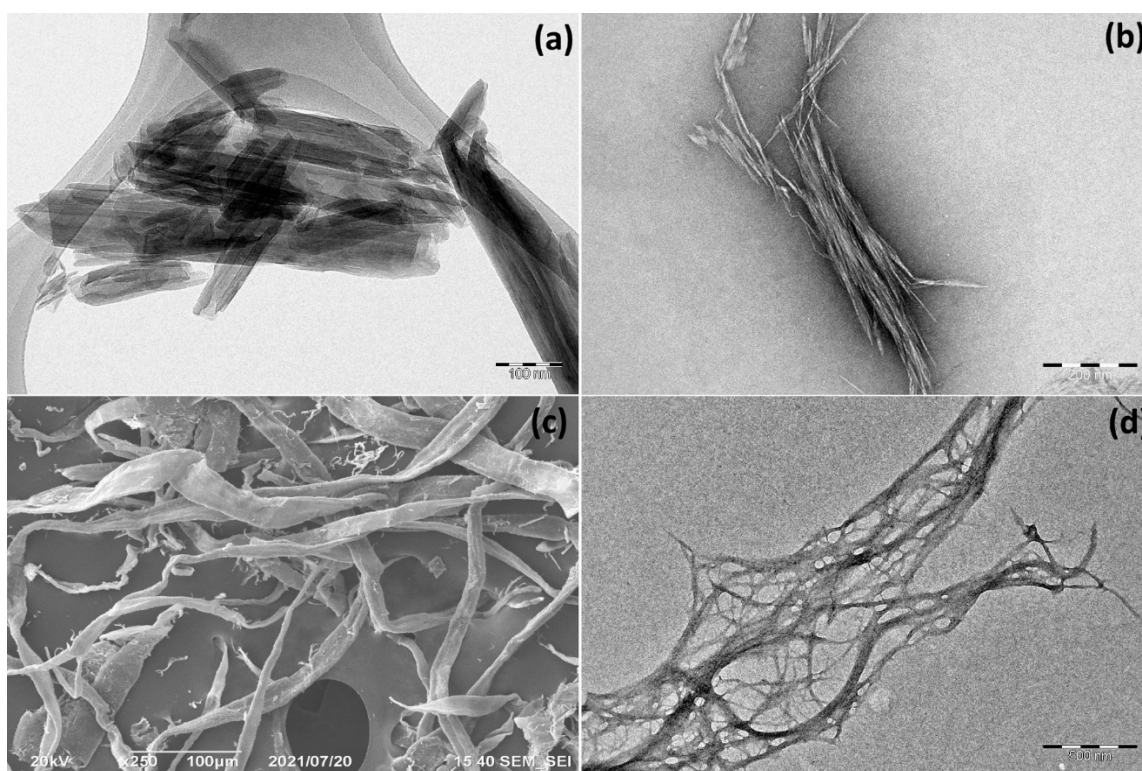

**Figure S1.** Electron microscopy micrographs of HNT (a), NCC (b), MFC (c), NFC (d).

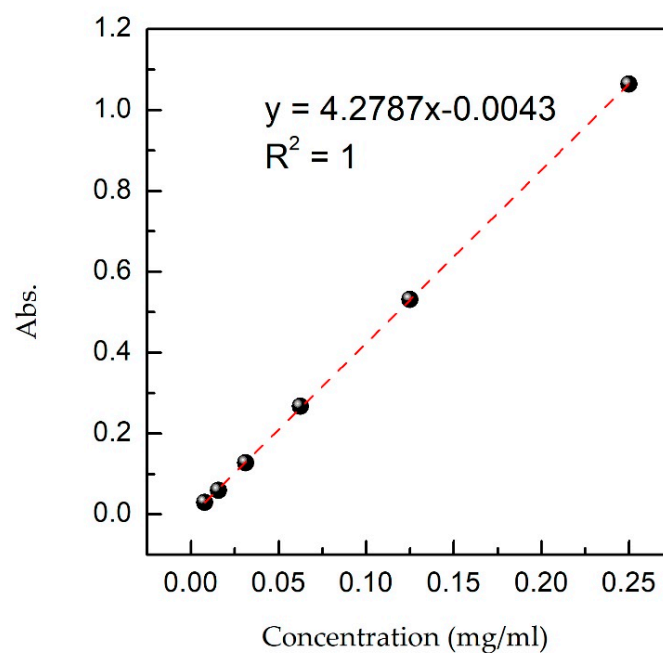

**Figure S2.** Calibration curve for determination of vancomycin concentration in aqueous solution by its optical density.

**Table S1.** Composition of surgical Simplex P radiopaque bone cement.

| <i>Powder component (40 g)</i>                                   |         |
|------------------------------------------------------------------|---------|
| MMA and styrene copolymer (1.7 wt.%)                             | 29.49 g |
| PMMA                                                             | 6 g     |
| Benzoyl peroxide                                                 | 0.51 g  |
| BaSO <sub>4</sub> (Ph. Eur., USP)                                | 4 g     |
| <i>Liquid component (20 ml, <math>\rho = 0.935</math> mg/ml)</i> |         |
| MMA                                                              | 19.5 ml |
| N,N- dimethylparatoluidine                                       | 0.5 ml  |
| Hydroquinone                                                     | 1.5 mg  |

**Table S2.** Composition of surgical Simplex P radiopaque bone cement.

| Wood                       | Spruce  |
|----------------------------|---------|
| Whiteness, %               | 88      |
| Ash content, %             | 0.10    |
| Roughness, $\mu$ g         | 107     |
| Fiber length, mm           | 2.34    |
| pH of the water extraction | 5.5 - 7 |
